# Supplementary material for: From bites to barcodes: uncovering the hidden diversity of black flies (Diptera: Simuliidae) in Vietnam
Source: PubMed Central journal article supplement (PMC10405495; doi:10.1186/s13071-023-05892-0), 2023-08-07
Supplement: 13071_2023_5892_MOESM5_ESM.pdf [file 13071_2023_5892_MOESM5_ESM.pdf]

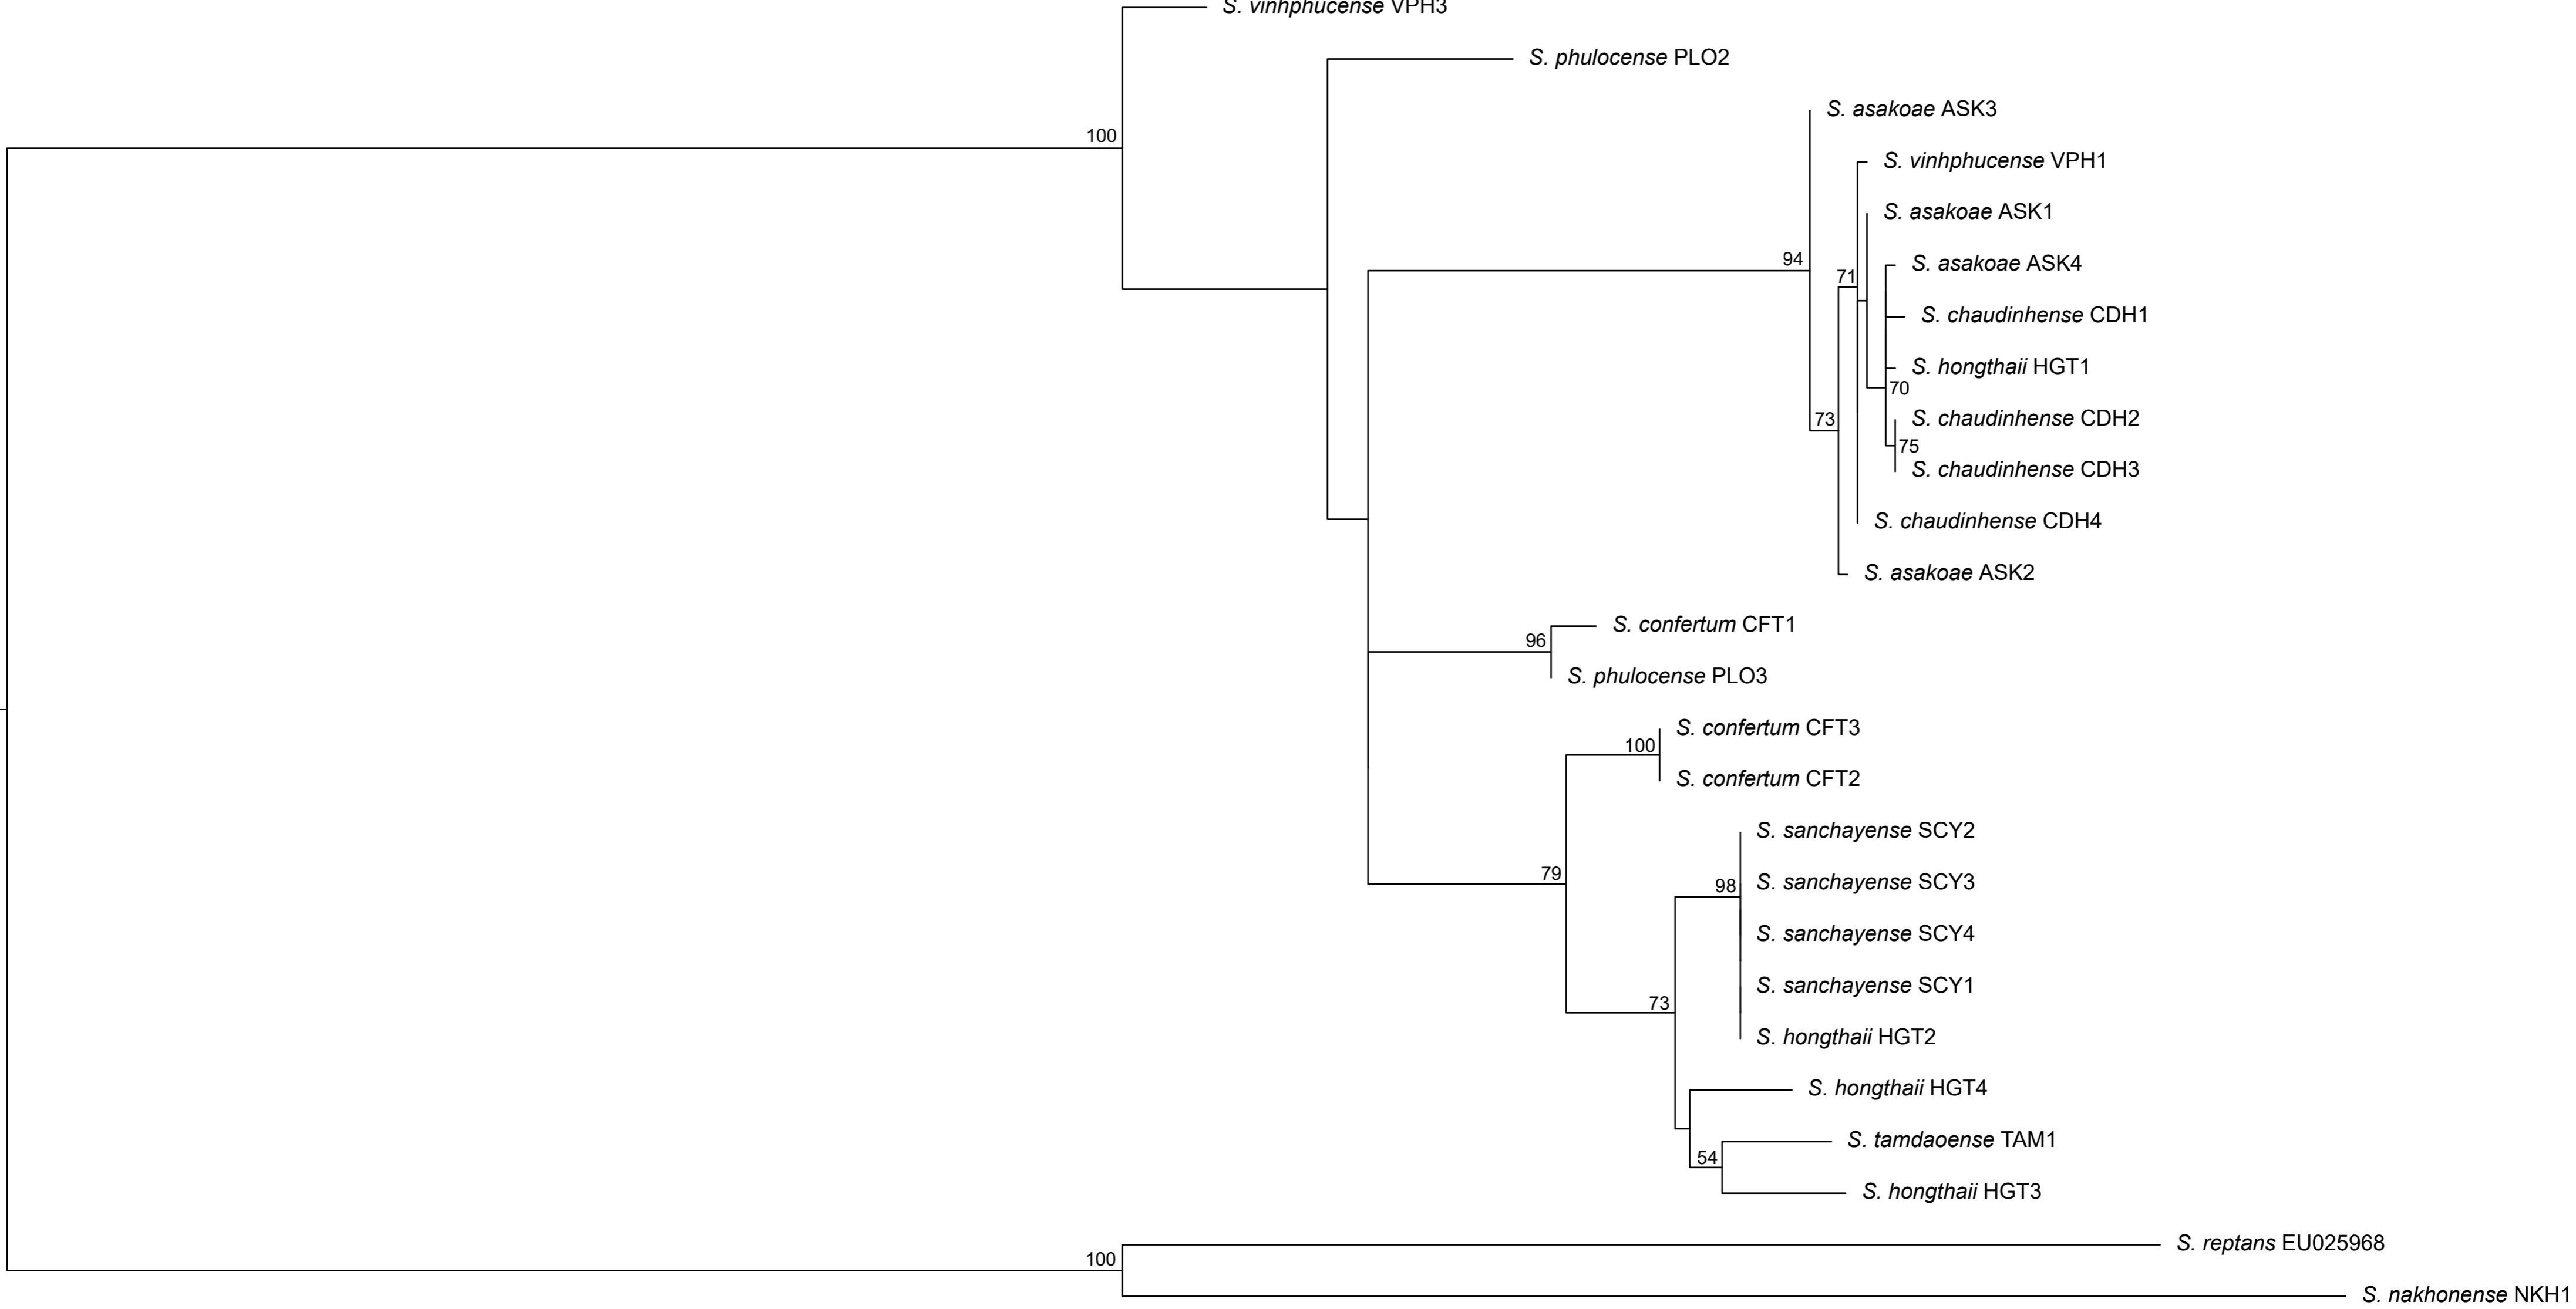

0.08
